1 **Recently emerged and diverse lineages of *Xanthomonas perforans* have independently**  
2 **evolved through plasmid acquisition and homologous recombination originating from**  
3 **multiple *Xanthomonas* species**

4 Newberry, E. A.<sup>1</sup>, Bhandari, R.<sup>1</sup>, Minsavage, G.V.<sup>2</sup>, Timilsina, S.<sup>2</sup>, Jibrin, M.<sup>2</sup>, Kemble, J.<sup>1</sup>,  
5 Sikora, E.<sup>1</sup>, Jones, J.B.<sup>2</sup>, and Potnis, N.<sup>1\*</sup>

6 <sup>1</sup> Department of Entomology and Plant Pathology, Auburn University, AL 36849

7 <sup>2</sup> Department of Plant Pathology, University of Florida, FL 32611.

8 \*Corresponding author: Neha Potnis, [nzp0024@auburn.edu](mailto:nzp0024@auburn.edu)

9 Running Title: Recent emergence of novel *Xanthomonas perforans* lineages

10 **Abstract**

11 *Xanthomonas perforans* is the predominant pathogen responsible for bacterial leaf spot of tomato  
12 and *X. euvesicatoria* of pepper in the southeast United States. Previous studies have indicated  
13 significant changes in the *X. perforans* population collected from Florida tomato fields over the  
14 span of two decades including a shift in race, diversification into three genetic groups, and host  
15 range expansion to pepper. Recombination originating from *X. euvesicatoria* was identified as  
16 the primary factor driving the diversification of *X. perforans* in Florida. The aim of this study  
17 was to genetically characterize *X. perforans* strains that were isolated from tomato and pepper  
18 plants grown in Alabama and compare them to the previously published genomes available from  
19 GenBank. Surprisingly, a maximum likelihood phylogeny coupled with a Bayesian analysis of  
20 population structure revealed the presence of two novel genetic groups in Alabama, which each  
21 harbored a different transcription activation-like effector (TALE). While one TALE, *avrHah1*,

22 was associated with adaptation of *X. perforans* to pepper, the other was identified as a new class  
23 within the *avrBs3* family, designated here as *pthXp1*. Examination of patterns of homologous  
24 recombination between *X. perforans* and other closely related *Xanthomonas* spp. indicated that  
25 the lineages identified here emerged in part through recent recombination events originating  
26 from xanthomonads associated with diverse hosts of isolation. Our results also suggest that the  
27 evolution of pathogenicity to pepper has likely emerged independently within *X. perforans* and  
28 in one lineage, was associated with the recombination-mediated remodeling of the Xps type II  
29 secretion and TonB transduction systems.

### 30 **Importance**

31 The emergence of novel pathogen lineages has important implications in the sustainability of  
32 genetic resistance as a disease management tool in agricultural ecosystems. In this study, we  
33 identified two novel lineages of *X. perforans* in Alabama. While one lineage was isolated from  
34 symptomatic pepper plants, confirming the host range expansion of *X. perforans*, the other  
35 lineage was isolated from tomato and acquired a novel transcription activation-like effector,  
36 *pthXp1*. Unlike *AvrBs4*, *PthXp1* overcomes *Bs4*-mediated resistance in tomato, indicating the  
37 evolution of this novel lineage towards fitness on this host. Our findings also show that different  
38 phylogenetic groups of the pathogen have experienced independent recombination events  
39 originating from multiple *Xanthomonas* species. This suggests a continuous gene flux between  
40 related xanthomonads associated with diverse plant hosts which results in the emergence of  
41 novel pathogen lineages and associated phenotypes, including host range expansion.

### 42 **Introduction**

43           The importance of genetic exchange in bacterial evolution can be traced back as early as  
44 to the 1960's, where plasmid-mediated transfer of penicillin resistance was documented among  
45 members of the *Enterobacteriaceae* (1). With the increasing availability of bacterial genomes, it  
46 has since become clear that the exchange of mobile genetic elements including plasmids,  
47 bacteriophage, genomic islands, and other mechanisms of horizontal gene transfer are  
48 commonplace among bacterial populations. Such genetic exchanges can confer traits imparting  
49 phenotypic and genotypic plasticity to a bacterial species in response to changes in the  
50 environment (2), thus, facilitating adaptive evolution. In addition to horizontal gene transfer,  
51 many bacteria undergo homologous recombination. This is a process similar to meiotic  
52 recombination, in which segments of a bacterial genome are replaced by homologous sequences  
53 from a donor organism, resulting in a mosaic pattern of loci with distinct evolutionary histories  
54 (3).

55           In the absence of barriers such as adaptive incompatibility, related bacterial lineages are  
56 expected to display evidence of admixture in their evolutionary history when they inhabit  
57 overlapping environmental niches (4). Therefore, patterns of recombination are hypothesized to  
58 reflect a corresponding microbial ecology and maintain the cohesion of various bacterial species  
59 as monophyletic groups (5). In contrast to many genera of plant-pathogenic bacteria including  
60 *Pseudomonas*, *Ralstonia*, and *Burkholderia*, among others which are abundant in multiple  
61 environments including water and soil, the life history of *Xanthomonas* spp. has traditionally  
62 been considered to be restricted to plants (6). Most xanthomonads exhibit a high degree of host-  
63 specificity, with the individual species (or the pathovars found within them) each forming a  
64 genetically monomorphic cluster of lineages. This evolutionary trend suggests that the

65 divergence of *Xanthomonas* species/pathovars is primarily driven by ecological isolation  
66 associated with adaptation to a particular host (7–9).

67         Among the numerous plant diseases caused by xanthomonads, bacterial leaf spot of  
68 tomato (*Solanum lycopersicum*) and pepper (*Capsicum annuum*) is atypical as four distinct  
69 species including *X. gardneri*, *X. euvesicatoria*, *X. perforans*, and *X. vesicatoria* have converged  
70 on these hosts to cause the same disease (10). These species may differ in geographic distribution  
71 as well as in the molecular mechanisms employed in pathogenesis (11–13). Likewise, temporal  
72 shifts in the species and pathogen races (as determined by gene for gene interactions) responsible  
73 for the disease in specific tomato and pepper production regions have been documented over the  
74 years (12, 14). Although these fluxes in the pathogen population are subject to random genetic  
75 drift associated with patterns of international trade, evolutionary and ecological factors such as  
76 horizontal gene transfer, homologous recombination, and interspecific competition via the  
77 production of antagonistic bacteriocins are also significant factors contributing to these  
78 population dynamics (15–19). Therefore, bacterial leaf spot presents an attractive model system  
79 enabling the investigation of adaptive evolution in a bacterial population mediated by  
80 recombination, host selection pressure, and interspecific competition.

81         Currently, *X. perforans* can be divided into three different phylogenetic groups (19).  
82 Until the isolation of a single *X. perforans* strain from an infected pepper sample during the 2010  
83 season in Florida (20), the host-range of this bacterial pathogen was thought to be restricted to  
84 tomato. This observation led to subsequent investigations which revealed that in the absence of  
85 effector triggered immunity induced by a single avirulence gene (either *avrBsT* or *avrXv3*), *X.*  
86 *perforans* strains representative of the three phylogenetic groups differed in their ability to  
87 multiply and cause disease when infiltrated into pepper leaves (20). Intriguingly, genomes of the

88 pepper-pathogenic, group 2 *X. perforans* strains displayed evidence of extensive recent  
89 recombination originating from *X. euvesicatoria* (which is the predominant pathogen of pepper),  
90 whereas similar signatures were reported to be minimal among the group 1, tomato-limited  
91 strains (13, 19).

92         Given the close evolutionary relationship (average nucleotide identity values greater >  
93 98%) and overlapping host-range of *X. perforans* and *X. euvesicatoria*, it is not surprising to find  
94 evidence of genetic exchange between them. In fact, several authors have proposed that they be  
95 considered pathovars of *X. euvesicatoria*, rather than distinct species (21, 22) and are closely  
96 related to a number of strains located within the *X. euvesicatoria* species complex, *sensu*  
97 Parkinson et al. (23). The strains that belong to this larger phylogenetic group were classified  
98 into several species including *X. alfalfae*, *X. axonopodis*, *X. perforans* and *X. euvesicatoria* and  
99 are associated with diseases of diverse monocot and dicotyledonous plant families (23). While  
100 the importance of homologous recombination in facilitating the emergence of novel *X. perforans*  
101 lineages has been established (18, 19), the extent of genetic exchange across the larger *X.*  
102 *euvesicatoria* species complex and specific functional pathways affected by homologous  
103 recombination remains to be explored.

104         A detailed knowledge of the population structure of xanthomonads responsible for  
105 bacterial leaf spot of tomato and pepper in the southeast United States comes primarily from  
106 surveys conducted in Florida and to a limited extent in Georgia, South Carolina and North  
107 Carolina, where to date, only a single *X. perforans* strain has been isolated from naturally  
108 infected pepper plants (20). In a recent survey of the *Xanthomonas* population responsible for the  
109 disease in Alabama, we were readily able to isolate *X. perforans* strains from pepper plants  
110 grown in several Alabama counties (Potnis et al., *unpublished data*). This indicates a recent shift

111 in the host range of the pathogen and an emerging threat to pepper production. Here, we  
112 sequenced the genomes of eight *X. perforans* strains that were isolated from tomatoes and  
113 peppers grown in Alabama and compared them with previously published genome data available  
114 from GenBank. Using a Bayesian statistical approach, we refined the population structure of *X.*  
115 *perforans* with the identification of two novel phylogenetic groups. Our findings indicate that the  
116 recent emergence of these genetic groups was associated with the acquisition of novel  
117 transcription activator-like effectors and independent recombination events originating from  
118 multiple species found within the *X. euvesicatoria* species complex.

## 119 **Results**

120 **Reconstruction of the *X. perforans* (*Xp*) core genome reveals the presence of two**  
121 **novel genetic clusters composed of *Xp* strains collected in Alabama.** A maximum likelihood  
122 phylogeny constructed from a concatenated alignment of 16,501 high quality, core-genome  
123 single nucleotide polymorphisms (SNPs), coupled with a Bayesian analysis of population  
124 structure (24), revealed the presence of six distinct genetic clusters within *X. perforans* (Fig. 1).  
125 Sequence clusters (SCs) 1 through 4 corresponded to the previously described population  
126 structure of *X. perforans* strains collected in Florida (19, 20), while SCs 5 and 6 were composed  
127 exclusively of Alabama strains sequenced in this study. Each of the genetic clusters inferred in  
128 this analysis were primarily clonal within the lineage, except for SC2 (referred to as Group 1b by  
129 Schwartz et al. (20), which exhibited diversity. SC3 (Group 2) contained the Florida strain  
130 originally isolated from pepper (Xp2010) as well as other strains demonstrated as pathogenic to  
131 this host under artificial inoculation conditions (20). A single Alabama strain (ALS7E) isolated  
132 from pepper clustered within this group, while the remaining pepper strains (ALS7B, AL65, and  
133 AL66) and one tomato strain (AL1) formed a novel phylogenetic lineage, designated here as

134 SC6. The Alabama strain AL57 grouped with other *X. perforans* strains collected in Florida  
135 within SC4 (Group 3). This genetic cluster branched from SC5, which was composed of two  
136 Alabama strains (AL33 and AL37) isolated from tomato plants.

137 **Analysis of type 3 secreted effector (T3SE) repertoires provides evidence for the**  
138 **plasmid mediated acquisition of several accessory T3SEs, including the transcription**  
139 **activation-like effector (TALE) *avrHah1*, among *Xp* strains collected in Alabama.** A total of  
140 24 T3SEs were conserved among the *Xp* strains sequenced in this study (Table 2). These results  
141 were largely concordant with conserved effectors identified across the *Xp* population  
142 characterized in Florida (20), except for *xopE2*, which was carried by only three strains (AL33,  
143 AL37, and ALS7E) sequenced here and was present in contigs which displayed 100% identity to  
144 plasmid pLH3.2 (NZ\_CP018476.1) from *Xp* strain LH3. These contigs also contained genes  
145 encoding for copper resistance including *copA*, *copB*, *copF*. Strains AL33, AL37, and AL57  
146 carried an intact copy of the avirulence gene *avrXv3*, which was disrupted by an insertion  
147 sequence in the other Alabama strains. The inability of the latter strains to induce an HR in the  
148 pepper cv. Early Cal Wonder (ECW) confirmed the non-functionality of *avrXv3*, while the  
149 former stains with the intact allele elicited an HR in ECW (Table 2).

150 Several other variable T3SEs were identified among the Alabama strains along with  
151 evidence of their presence in putative plasmids. The T3SEs *xopAQ* and disrupted copy of *xopE3*  
152 were present in strains AL37 and AL57, while absent from the genome assemblies of other  
153 Alabama strains. These effectors were present in the same contig assembled by plasmidSPAdes  
154 in strain AL57 which displayed significant homology (99% nucleotide identity and 94% query  
155 coverage) to an unnamed plasmid found in *X. campestris* pv. *campestris* strain CN18  
156 (CP017322.1). Likewise, an unidentified T3SE with homology to *avrBsT* (71% aa identity) was

157 also carried on a putative plasmid in the same two strains. The top BLAST hit for these contigs  
158 (94% nucleotide identity over 87% query coverage) was plasmid pXCARECAE29  
159 (NZ\_CP034654.1) from *X. campestris* pv. *arecae* strain NCPPB 2649.

160 Analysis with plasmidSPAdes software also revealed the presence of several contigs in  
161 all but one of the strains (ALS7B) located in genetic cluster SC6, which displayed 100%  
162 nucleotide identity and over 99% query coverage to the completed plasmid pJS749-3.2  
163 (NZ\_CP018730.1) from *X. gardneri* strain JS749-3. The sequences corresponding to this  
164 putative plasmid were divided between two and five contigs per strain and summed from 43 to  
165 45 kb, which was consistent with the size pJS749-3.2 (46 kb). Analysis of these contigs with  
166 tBLASTn produced significant hits for the TALE *avrHah1* and the T3SE *xopAO*. The activity of  
167 *avrHah1* among these strains was supported through inoculations in the pepper cv. ECW, which  
168 produced the profuse water-soaking phenotype associated with this TALE (Fig. S1). Further  
169 evidence was obtained through inoculations in pepper cv. ECW30R, which resulted in a  
170 hypersensitive resistance (Table 2). The contigs assembled by plasmidSPAdes and BLAST  
171 search results are presented in Table S2.

172 **Identification of a novel class of TALE within the *avrBs3* family among different**  
173 **genetic backgrounds of *Xp*.** Screening of the genome assemblies for T3SEs with tBLASTn  
174 indicated the presence of a putative TALE with homology to *avrBs3* in strains AL57 and AL37  
175 of SCs 4 and 5 respectively. Phusion polymerase chain reaction (PCR) utilizing primers designed  
176 to anneal to conserved loci within the N- and C-terminal domains of the *avrBs3* effector family  
177 produced an ~2.9 kb amplicon (Fig S2). Sanger sequencing of the amplicon utilizing internal  
178 primers flanking the repeat region of *avrBs3* revealed that the TALE was comprised of 15.5  
179 tandem repeats, each 102 bp in length. A BLAST search of the NCBI non-redundant protein



180 database using the N- and C-terminal domains of the protein displayed 99 and 100% identity,  
181 respectively, to the *avrBs3* allele (X16130.1) found in *X. vesicatoria*.

182 Despite this close homology to *avrBs3*, an alignment of the repeat variable di-residue  
183 (RVD) sequences with AnnoTALE software indicated that this gene could not be placed into the  
184 same class as any TAL effector for which sequence data was available (maximum distance  $\leq 5.0$   
185 and  $p \leq 0.01$ ). An alignment of the RVDs with other TAL effectors found in bacterial spot  
186 xanthomonads showed that the *avrBs3*-like effector shared several blocks of homology with  
187 *avrBs4*; however, differed by an average pairwise distance of 8.8 RVDs. Inoculation of strains  
188 AL37 and AL57 on tomato cv. Bonny Best and MoneyMaker, with the *Bs4* resistance gene,  
189 resulted in a compatible interaction and indicated that this TALE was not recognized by *Bs4*  
190 (Fig. 2).

191 **Novel diversity within *Xp* emerged through recent recombination derived from**  
192 **outside of the bacterial spot species complex.** To examine patterns of homologous  
193 recombination between *Xp*, *Xeu*, and other closely related *Xanthomonas* spp., a second core  
194 genome alignment was constructed utilizing the strains sequenced in this study and respective  
195 genome assemblies available from GenBank ( $n = 68$ ). A maximum likelihood phylogeny  
196 generated from the resulting 3.98 Mb alignment was largely congruent to the population  
197 structure inferred by previous studies (18, 20) and showed *Xp* and *Xeu* branching from each other  
198 into two distinct phylogenetic groups, while other related *Xanthomonas* spp. displayed  
199 considerably longer branch lengths and clustered into a paraphyletic group of strains. Analysis  
200 with FastGear software indicated the presence of three distinct lineages, which were defined as a  
201 group of strains that shared a common ancestry in at least half of the alignment (3) and  
202 corresponded to the three phylogenetic groups described above (Fig. 3A).

203           A total of 3,174 recent recombination events were identified across the *Xeu* species  
204 complex (Fig. 3B). Consistent with the long branch lengths, the lineage composed of various  
205 *Xanthomonas* spp. displayed evidence of extensive recent recombination, with an average ( $\pm$   
206 standard deviation)  $19.00 \pm 0.88\%$  of the core genome predicted to be recombinant among the  
207 individual strains. A considerable amount of recent recombination found within this group  
208 originated from both the *Xp* and *Xeu* lineages (7.31 and 5.90% of the alignment respectively);  
209 however, the proportion of gene flux from each donor lineage was somewhat variable at the  
210 strain level (standard deviations of  $\pm 2.16$  and  $\pm 1.19\%$  for *Xp* and *Xeu* respectively).  
211 Interestingly, approximately a third of the recombinant sequences detected in this lineage ( $5.90 \pm$   
212  $2.33\%$  of the alignment) were predicted to have originated from outside of the sampled  
213 *Xanthomonas* population (Fig. 4).

214           Evidence of recent recombination was also apparent within the *Xp* lineage. Nearly all of  
215 the recent recombination events detected in the Florida *Xp* strains collected prior to 2015 (SCs 1  
216 through 3) were predicted to have originated from *Xeu*, whereas recombination events derived  
217 from both *Xeu* and the lineage composed of various *Xanthomonas* spp. were detected in the  
218 recently described, Group 3 *Xp* strains (designated here as SC4), as well as the Alabama strains  
219 located in SCs 5 and 6. The average proportion of core genome donated from various  
220 *Xanthomonas* spp. ranged from 1.51 to 2.79% among these groups and was the primary donor of  
221 recent recombination (66.7% of total recent recombinant sequences) to the pepper pathogenic  
222 strains of SC6. Variability in the overall proportion of recent recombination was also observed  
223 among the *Xp* sequence clusters ranging from  $1.41 \pm 1.70\%$  in SC1 to  $9.64 \pm 0.00\%$  in SC5 (Fig.  
224 4).

225           **Recombination hot-spots are characterized by pathways involved in the**  
226 **acquisition/metabolism of plant-derived nutrients and motility.** We investigated seven  
227 recombination “hot-spots” within *X. perforans* based on the frequency of recombination events  
228 at a particular site in the core genome alignment (Fig. 3C). Hot-spots (ii), (vi), and (vii) mapped  
229 to loci with genes involved in carbohydrate and amino acid metabolism including a  
230 xyloglucanase, *lysR*-type regulator of galactose metabolism (*gamR*), transketolase, a symporter  
231 of protons/glutamate (*gltP*), and a glucokinase. All of these genes were adjacent to at least one  
232 TonB-dependent receptor (TBDR) while a fourth TBDR locus, hot-spot (i) contained the  
233 flagellar motor components *motA* and *motB*. It was therefore interesting to find the entire TonB-  
234 transduction system (*tonB-exbB-exbD1-exbD2*) at recombination hot-spot (v). Other genes in  
235 recombination hot-spots included an iron-sulfur oxidoreductase (iii) and a gene with homology  
236 to colicin V production protein *cvpA* (iv). Finally, while not necessarily present in hot-spots, we  
237 noted that most of the genes which encode for the Xps type II and type VI secretion systems  
238 were recombinant among strains from SCs 3 and 1, respectively.

## 239 **Discussion**

240           Upon introduction of *X. perforans* (*Xp*) to Florida tomato fields in 1991, the bacterial  
241 species has undergone several changes over the past two decades including overtaking *X.*  
242 *euvesicatoria* (*Xeu*) as the predominant pathogen of tomato, a shift in race associated with null  
243 mutations affecting the type 3 secreted effector *avrXv3*, and divergence into three different  
244 phylogenetic groups (12, 19, 20, 25). Until the isolation of a single *Xp* strain from an infected  
245 pepper sample during the 2010 season in Florida (20), the host-range of this bacterial pathogen  
246 was thought to be restricted to tomato. Here, we report for the first time the genomes of several

247 *Xp* strains that were isolated from naturally infected pepper plants grown in Alabama as well as  
248 four strains isolated from tomatoes in the state (Table 1).

249         Maximum likelihood reconstruction of the *Xp* core genome revealed the presence of  
250 novel diversity among the strains sequenced in this study, with the identification of two  
251 additional phylogenetic groups, designated here as sequence clusters (SCs) 5 and 6 (Fig. 1). To  
252 our surprise, the majority of pepper strains did not group with others within SC3 that were  
253 previously found to be pathogenic to pepper but comprised the newly emerged SC6. Three of the  
254 four strains located within this phylogenetic group carried a plasmid identical to one often found  
255 in *X. gardneri*, which harbored two different type 3 secreted effectors including *xopAO* and the  
256 transcription activation-like effector (TALE) *avrHah1* (Table 2). The latter effector is commonly  
257 associated with enhanced virulence to pepper plants through hijacking the host-expression of  
258 pectate lyase genes, which results in a profuse water-soaking phenotype and proliferation of  
259 bacterial growth (26, 27). However, as the pepper strain ALS7B lacked the plasmid associated  
260 with the horizontal transfer of *avrHah1*, it is clear that this TALE contributes to increased  
261 symptom development but is not necessary for pathogenicity to pepper among strains of this  
262 genetic background (Fig. S1). Interestingly, strain ALS7B was isolated from plants collected  
263 from same pepper field in Tuscaloosa county as ALS7E of SC3, indicating the occurrence of  
264 mixed infections among *Xp* lineages.

265         A second unique phylogenetic group, referred to here as SC5, was identified in our  
266 analyses and comprised two Alabama strains that were isolated from tomato plants collected  
267 from commercial production fields. This phylogenetic group branched separately from SC4 (also  
268 referred to as group 3), which was recently found to be prevalent in Florida tomato fields (19).  
269 Screening of the genome assemblies with tBLASTn revealed that the Alabama strains located in

270 these two sequence clusters carried an intact copy of the avirulence gene *avrXv3*, which as has  
271 not been observed in the *Xp* population surveyed in the Florida since 2006 (14, 20). Interestingly,  
272 the *avrXv3* allele found in the strains sequenced here differed from other available sequences by  
273 two amino substitutions located at both the N- and C-terminal domains of the protein (data not  
274 shown); however, these mutations did not allow for *avrXv3* to escape host-recognition (Table 2).

275         Strains AL57 and AL37, of SCs 4 and 5 respectively, also carried a TALE which  
276 belonged to the *avrBs3/avrBs4* family of effectors commonly found in *X. euvesicatoria* and *X.*  
277 *vesicatoria*. To our knowledge, this is the first identification of an *avrBs3*-like in *Xp*. Moreover,  
278 it was surprising to find an effector from this family in strains isolated from tomato as *avrBs4*  
279 serves an avirulence gene when expressed in plants with the cognate *Bs4* resistance gene, while  
280 *avrBs3* does not elicit a hypersensitive response, it is likely a negative factor (28). We confirmed  
281 that the *Xp* strains carrying this effector did not induce a *Bs4*-mediated resistance in tomato cv.  
282 Moneymaker and grew to high populations, comparable to strains devoid of TALEs, in tomato  
283 cv. Bonny Best (Fig 2). Analysis of the repeat variable di-residues supported these observations  
284 and showed that the predicted binding specificity of the gene was divergent from other TALEs  
285 recorded in *Xanthomonas* spp., suggesting the evolution of this effector to avoid *Bs4*-mediated  
286 recognition. As the gene could not be assigned to the same class as any TALE for which  
287 sequence data was available, we propose the name *pthXp1*. Interestingly, we also noted evidence  
288 of a similar *avrBs3*-like effector in the genome assemblies of the Florida *Xp* strains located in  
289 SC4 and therefore, may be a significant factor contributing to the recent emergence of this  
290 pathogen lineage (data not shown).

291         Investigation of these strains in the context of the larger *Xeu* species complex revealed a  
292 dynamic pattern of gene flow between *Xp*, *Xeu*, and a third lineage which was composed of

293 various *Xanthomonas* spp. (Fig. 3). The latter lineage exhibited evidence of extensive admixture,  
294 with ~19% of the core-genome affected by recent recombination events derived from both *Xp*,  
295 *Xeu*, and an unidentified donor outside of the sampled *Xanthomonas* population (Fig. 4). As  
296 these strains were isolated from numerous hosts including pepper, alfalfa, citrus, onion,  
297 Anthurium, and Commiphora, among others (Table S1), this could be an indication of a cryptic  
298 ecology within the *Xeu* species complex. Host-range studies of *Xeu* and related pathogens have  
299 shown that strains often have the capacity to colonize and/or infect several plant species beyond  
300 their original host of isolation (29–32), thus supporting this hypothesis. However, because the  
301 individual branches found within this apparently host-generalist lineage were as equally diverged  
302 as that of the *Xp* and *Xeu* lineages (Fig. 3A), it is possible that these contrasting evolutionary  
303 patterns may reflect adaptation to diverse hosts.

304 Consistent with previous observations (19), *Xeu* was the primary donor of recent  
305 recombination to *Xp* (Fig 3B). Each of the SCs inferred within this lineage were affected by  
306 recent recombination to varying degrees (Fig. 4), which correlated with the branch lengths  
307 observed in the core-genome phylogeny (Fig 1). Interestingly, the recent emergence of SCs 4, 5,  
308 and 6 was associated in-part with the acquisition of recombinant sequences from the lineage  
309 composed of various *Xanthomonas* spp., which were absent from the *Xp* strains found to  
310 predominant in Florida prior to 2015 (SCs 1 through 3; Fig. 4). Surprisingly, this lineage was the  
311 primary donor of recent recombination to the pepper pathogenic strains of SC6, for which only a  
312 minor proportion of the core genome (4.18%) carried signals of homologous recombination. This  
313 contrasted with the pepper pathogenic strains of SC3, which acquired ~8.10% of the core-  
314 genome from *Xeu* (Fig. 4) and suggests that the evolution of pathogenicity to pepper among  
315 strains from these two phylogenetic groups has likely emerged independently.

316 Examination of recombination hot-spots within *Xp* revealed that several loci implicated  
317 in the plant-pathogen interaction were frequently recombining (Fig. 3C). Most of these  
318 recombination tracts contained genes associated with nutrient acquisition/metabolism (*gamR*,  
319 *gltP*, *fhuE*, a transketolase, and glucokinase) and motility (*motC*, *motD*), and were often adjacent  
320 to at least one TonB-dependent receptor. This class of outer membrane receptor binds with high  
321 specificity to a variety of macromolecules, including plant-derived carbohydrates and iron, and  
322 facilitates the active transport of substrates into the periplasm via the TonB transduction system  
323 (33). It was therefore curious to note that the core components of this system (*tonB1*, *exbB1*,  
324 *exbD1*, *exbD2*, and *exbD3*) were also present in a separate recombination hot-spot. One gene,  
325 *exbD2*, distinguished the TonB operon found in *Xanthomonas* spp. from that of most other  
326 bacterial genera and is essential for pathogenicity and induction of bacterial pectate lyase activity  
327 (34, 35). Interestingly, we found that in addition to the TonB system, the entire Xps type II  
328 secretion cluster was recombinant among the pepper pathogenic strains of SC3. The importance  
329 of the Xps type II gene cluster in the secretion of numerous plant-cell wall degrading enzymes  
330 and virulence has been well established in *Xeu* (36–38). Therefore, it is possible that the  
331 recombination-mediated remodeling of the TonB and Xps type II systems may affect the  
332 secretion of plant cell-wall degrading enzymes and the regulation of downstream pathogenesis  
333 processes, leading to adaptation within the pepper niche.

334 Further work is required to test this hypothesis and to investigate the evolutionary  
335 processes enabling certain *Xp* lineages to infect pepper plants in the absence of a gene for gene  
336 interaction, while the host-range of others remains limited to tomato (20). Given the population  
337 structure identified here, genome-wide association analysis may be an appropriate tool to  
338 investigate this phenomenon more rigorously. Overall, the diversity of the *Xp* population

339 observed in Alabama was striking in relation to that reported in neighboring tomato and pepper  
340 production regions in the United States and was indicative of an adaptive evolution. Recently,  
341 TALEs were also identified in *Xp* strains collected in Louisiana, USA and in Italy (Jones,  
342 *unpublished data*), pointing towards the recent acquisition of these virulence factors as a trend  
343 extending beyond the *Xp* population sampled in Alabama. Taken together, the results of this  
344 study highlight the need for regular pathogen surveillance when selecting gene candidates for  
345 resistance breeding.

## 346 **Material and Methods**

347 **Bacterial strain collection, sequencing, and assembly.** Eight bacterial strains, isolated  
348 from symptomatic tomato and pepper plants, grown in three different Alabama counties during  
349 the summer of 2017 (Table 1), were selected at random for draft genome sequencing. Genomic  
350 DNA was isolated using the CTAB-NaCl method, as described previously (39), and submitted to  
351 the Georgia Genomics and Bioinformatics Core, University of Georgia for library preparation  
352 and sequencing. Paired-end reads were generated by multiplexing 12 libraries in a single lane on  
353 an Illumina MiSeq Micro (PE150) and *de novo* assemblies were constructed using the A5-miseq  
354 pipeline under the default settings (v.20160825, 40). Briefly, adapter and quality trimming were  
355 performed with Trimmomatic (41), followed by error correction with the kmer-based String  
356 Graph Assembler algorithm (42), and contig assembly using the Iterative de Bruijn Graph  
357 Assembler (43). The genome assemblies and raw sequencing reads were submitted to NCBI  
358 GenBank under BioProject accession number PRJNA526717.

359 **Reconstruction of the *X. perforans* core genome.** To test for a nested population  
360 structure within *X. perforans*, a read-mapping approach was taken using the Snippy pipeline  
361 (v.4.3.5, 44). The sequencing reads for 33 *X. perforans* strains described by Schwartz et al. (20)



362 and Timilsina et al. (19) were downloaded from the Sequence Read Archive database  
363 (PRJNA526741) and subjected to adapter and quality trimming with Scythe (v.0.991,  
364 <https://github.com/vsbuffalo/scythe>) and SolexaQA respectively (v.3.1.7.1, 45). These data were  
365 combined with the quality-trimmed reads generated in this study and were individually aligned  
366 against the completed genome of *X. perforans* strain 91-118 using the Burrows-Wheeler  
367 Alignment tool (v.0.7.17-r1188, 46). Only reads with a mapping quality of 60 (i.e., uniquely  
368 mapped reads) and Phred quality score of 20 (at least 99% consensus) were included in the  
369 analysis, while soft-clipped reads were filtered from the data-sets with SAMtools (v.1.9, 47).  
370 Variants were called from the whole genome alignments using FreeBayes (v.1.2.0, 48) and  
371 single-nucleotide polymorphisms (SNPs) common to all genomes were extracted to generate a  
372 concatenated set of high-quality core-genome SNPs. This concatenated SNP alignment was used  
373 to infer the population structure of *X. perforans* using HierBAPS software with four hierarchy  
374 levels and an upper cluster limit of 20 (24). Additionally, a maximum likelihood phylogeny was  
375 inferred from the concatenated SNP alignment using iQTree (v.1.6.4, 49). The best fitting model  
376 (TVM+ASC+G4) was chosen using Model Finder (50) and branch support was assessed with the  
377 ultrafast bootstrap method using 1000 replicates (51). The phylogenetic tree was visualized and  
378 annotated using FigTree (v.1.4.2, <http://tree.bio.ed.ac.uk/software/figtree/>).

379 **Interlineage recombination.** To examine patterns of gene flow across the *X.*  
380 *euvesicatoria* species complex as described by Parkinson et al. (23), a core genome alignment  
381 was generated with the program Parsnp (52) using the genome assemblies of 39 *X. perforans*  
382 strains, 23 of *X. euvesicatoria*, and six of related *Xanthomonas* spp. available from GenBank  
383 (Table S1). Highly fragmented genome assemblies ( $\geq 400$  contigs) were excluded from this  
384 analysis as they were found to significantly reduce the alignment coverage of the reference

385 genome. The xmfa alignment file produced by Parsnp was converted to a multi-fasta format with  
386 the perl script xmfa2fasta.pl ([https://github.com/kjolley/seq\\_scripts/blob/master/xmfa2fasta.pl](https://github.com/kjolley/seq_scripts/blob/master/xmfa2fasta.pl))  
387 and used as input for the FastGear algorithm (3). This software was run under default settings  
388 with the statistical significance of recombination predictions tested using a Bayes factor (BF) > 1  
389 for recent recombination events and BF > 10 for ancestral recombination events. The resulting  
390 output was visualized using the Phandango web-server (53) and recombination “hot-spots”  
391 within *X. perforans* were visually assessed based on the frequency of recombination events at a  
392 particular site in the alignment after correcting for oversampling of clonal populations. Gene  
393 neighborhoods located in recombination hot-spots were extracted for the 91-118 reference  
394 chromosome and visualized using Gene Graphics (54). Finally, the core genome alignment was  
395 used to construct a maximum likelihood phylogeny using RAxML (v8.2.10, 55) with the Gamma  
396 Time Reversible model of nucleotide substitution and 1000 bootstrap replicates.

397 **Prediction of type 3 secreted effectors (T3SEs) and plasmids.** A database of T3SEs  
398 was compiled using the *Xanthomonas* web resource (<http://www.xanthomonas.org/t3e.html>) and  
399 used to query the genome assemblies generated in this study using tBLASTn (E-value  $\leq 10^{-5}$ ).  
400 An effector was considered to be present if it displayed  $\geq 80\%$  aa over 80% of the query length.  
401 Nucleotide sequences of putative effector genes were subsequently extracted from the genomes  
402 and examined for frameshift mutations and other potential disruption of the coding sequence  
403 with BLASTx. Plasmids were computationally predicted using plasmidSPAdes software (56).  
404 Contigs assembled by the program were subsequently screened against the NCBI nucleotide  
405 collection database (nr/nt) to assess for the presence of putative plasmid sequences. These  
406 contigs were also screened for T3SEs as described above.

407           **Sequencing and analysis of *pthXp1* from *X. perforans* strains AL37 and AL57.** After  
408 noting evidence an *avrBs3*-like effector in the genome assemblies of strains AL37 and AL57,  
409 forward (5'–ATGAGGTGCAATCGGGTCTG–3') and reverse (5'–  
410 GTCCTCATCTTGTTCCCGCA–3') primers were designed to anneal to conserved loci within  
411 the N- and C-terminal domains of *avrBs3*. Phusion high fidelity polymerase chain reaction  
412 (PCR) was used to amplify the gene with a T100 Thermal Cycler (BioRad, Hercules, CA). Each  
413 PCR reaction contained in a final volume of 50  $\mu$ l with 1 x Phusion Master Mix containing HF  
414 buffer (Thermo Scientific, Waltham, MA), 0.5  $\mu$ M of each primer, and 1  $\mu$ l of cells treated at  
415 95 $\square$  for 10 min. The cycling conditions consisted of an initial denaturation at 98 $\square$ C for 30 s,  
416 followed by 30 cycles of denaturation at 98 $\square$ C for 10 s, annealing at 63 $\square$ C for 30 s, extension at  
417 72 $\square$ C for 90 s, and a final extension of 72 $\square$ C for 10 min. The resulting amplicons were purified  
418 and submitted to Eurofins Genomics (Louisville, KY) for sanger sequence using the Power Read  
419 Service optimized for tandem repeat stretches with the internal sequencing primers (5'–  
420 AAGATTGCAAAACGTGGCGG–3') and (5'–CCGGATCAGGGCGAGATAAC–3').  
421 Classification of the completed transcription activation-like effector sequences and alignment of  
422 the repeat variable di-residues were conducted using AnnoTALE (v.1.4) software utilizing the  
423 default alignment parameters (57). The completed *pthXp1* sequences were submitted the NCBI  
424 GenBank with the accession numbers MK755838 and MK755839.

425           **Plant inoculations.** The strains sequenced in this study were assessed for the capacity to  
426 induce a hypersensitive resistance in three to four-week old pepper cv. Early California Wonder  
427 (ECW) and ECW30R as well as tomato cv. BonnyBest and MoneyMaker. Individual leaves were  
428 infiltrated with a needleless syringe using a bacterial suspension raised to 10<sup>8</sup> CFU ml<sup>-1</sup> (OD<sub>600nm</sub> =  
429 0.3) in a sterile MgSO<sub>4</sub> \* 7H<sub>2</sub>O solution. The presence of necrotic, collapsed tissue, 24h after

430 inoculation was scored as a positive result. The pathogenicity of strains was assessed using  
431 bacterial suspension prepared as described above and diluted to a concentration of  $10^4$  CFU ml<sup>-1</sup>  
432 using 10-fold serial dilutions. Bacterial populations were enumerated at 0 and 4 days after  
433 inoculation as described by Schwartz et al. (20) and a two-way analysis of variance was  
434 conducted to test for differences between treatments using JMP Pro 13 software (SAS Institute,  
435 Cary, NC). All plants were kept under standard greenhouse conditions and each strain was tested  
436 for the reactions described above at least twice.

### 437 **Acknowledgements**

438 This work was supported by the USDA National Institute of Food and Agriculture, Hatch project  
439 1012760 and Alabama Agricultural Experiment Station. We thank Alabama Cooperative  
440 Extension agents for their support in the collection of samples from the fields.

441

### 442 **References**

- 443 1. Datta N, Kontomichalou P. 1965. Penicillinase Synthesis Controlled By Infectious R  
444 Factors In *Enterobacteriaceae*. Nature 208:239.
- 445 2. Wu X, Monchy S, Taghavi S, Zhu W, Ramos J, van der Lelie D. 2011. Comparative  
446 genomics and functional analysis of niche-specific adaptation in *Pseudomonas putida*. Fems  
447 Microbiol Rev 35:299–323.
- 448 3. Mostowy R, Croucher NJ, Andam CP, Corander J, Hanage WP, Marttinen P. 2017.  
449 Efficient Inference of Recent and Ancestral Recombination within Bacterial Populations. Mol  
450 Biol Evol 34:1167–1182.
- 451 4. Wiedenbeck J, Cohan FM. 2011. Origins of bacterial diversity through horizontal genetic  
452 transfer and adaptation to new ecological niches. FEMS Microbiol Rev 35:957–976.
- 453 5. Dillon MM, Thakur S, Almeida RND, Wang PW, Weir BS, Guttman DS. 2019.  
454 Recombination of ecologically and evolutionarily significant loci maintains genetic cohesion in  
455 the *Pseudomonas syringae* species complex. Genome Biol 20:3.

- 456 6. Jacques M-A, Arlat M, Boulanger A, Boureau T, Carrère S, Cesbron S, Chen NWG,  
457 Cociancich S, Darrasse A, Denancé N, Fischer-Le Saux M, Gagnevin L, Koebnik R, Lauber E,  
458 Noël LD, Pieretti I, Portier P, Pruvost O, Rieux A, Robène I, Royer M, Szurek B, Verdier V,  
459 Vernière C. 2016. Using Ecology, Physiology, and Genomics to Understand Host Specificity in  
460 *Xanthomonas*. *Annu Rev Phytopathol* 54:163–187.
- 461 7. Hamza AA, Robene-Soustrade I, Jouen E, Lefeuvre P, Chiroleu F, Fisher-Le Saux M,  
462 Gagnevin L, Pruvost O. 2012. MultiLocus Sequence Analysis- and Amplified Fragment Length  
463 Polymorphism-based characterization of xanthomonads associated with bacterial spot of tomato  
464 and pepper and their relatedness to *Xanthomonas* species. *Syst Appl Microbiol* 35:183–190.
- 465 8. Huang C-L, Pu P-H, Huang H-J, Sung H-M, Liaw H-J, Chen Y-M, Chen C-M, Huang M-  
466 B, Osada N, Gojobori T, Pai T-W, Chen Y-T, Hwang C-C, Chiang T-Y. 2015. Ecological  
467 genomics in *Xanthomonas*: the nature of genetic adaptation with homologous recombination and  
468 host shifts. *BMC Genomics* 16:188.
- 469 9. Mhedbi-Hajri N, Hajri A, Boureau T, Darrasse A, Durand K, Brin C, Saux MF-L,  
470 Manceau C, Poussier S, Pruvost O, Lemaire C, Jacques M-A. 2013. Evolutionary History of the  
471 Plant Pathogenic Bacterium *Xanthomonas axonopodis*. *PLoS ONE* 8.
- 472 10. Jones JB, Lacy GH, Bouzar H, Stall RE, Schaad NW. 2004. Reclassification of the  
473 Xanthomonads Associated with Bacterial Spot Disease of Tomato and Pepper. *Syst Appl*  
474 *Microbiol* 27:755–762.
- 475 11. Potnis N, Krasileva K, Chow V, Almeida NF, Patil PB, Ryan RP, Sharlach M, Behlau F,  
476 Dow JM, Momol M, White FF, Preston JF, Vinatzer BA, Koebnik R, Setubal JC, Norman DJ,  
477 Staskawicz BJ, Jones JB. 2011. Comparative genomics reveals diversity among xanthomonads  
478 infecting tomato and pepper. *BMC Genomics* 12:146.
- 479 12. Potnis N, Timilsina S, Strayer A, Shantharaj D, Barak JD, Paret ML, Vallad GE, Jones  
480 JB. 2015. Bacterial spot of tomato and pepper: diverse *Xanthomonas* species with a wide variety  
481 of virulence factors posing a worldwide challenge. *Mol Plant Pathol* 16:907–920.
- 482 13. Timilsina S, Jibrin MO, Potnis N, Minsavage GV, Kebede M, Schwartz A, Bart R,  
483 Staskawicz B, Boyer C, Vallad GE, Pruvost O, Jones JB, Goss EM. 2015. Multilocus Sequence  
484 Analysis of Xanthomonads Causing Bacterial Spot of Tomato and Pepper Plants Reveals Strains  
485 Generated by Recombination among Species and Recent Global Spread of *Xanthomonas*  
486 *gardneri*. *Appl Env Microbiol* 81:1520–1529.
- 487 14. Timilsina S, Abrahamian P, Potnis N, Minsavage GV, White FF, Staskawicz BJ, Jones  
488 JB, Vallad GE, Goss EM. 2016. Analysis of Sequenced Genomes of *Xanthomonas perforans*  
489 Identifies Candidate Targets for Resistance Breeding in Tomato. *Phytopathology* 106:1097–  
490 1104.
- 491 15. Canteros B, Minsavage G, Bonas U, Pring D, Stall R. 1991. A gene from *Xanthomonas*  
492 *campestris* pv. *vesicatoria* that determines avirulence in tomato is related to *avrBs3*. *Mol Plant-*  
493 *Microbe Interact* MPMI 4:628–632.

- 494 16. Hert AP, Roberts PD, Momol MT, Minsavage GV, Tudor-Nelson SM, Jones JB. 2005.  
495 Relative Importance of Bacteriocin-Like Genes in Antagonism of *Xanthomonas perforans*  
496 Tomato Race 3 to *Xanthomonas euvesicatoria* Tomato Race 1 Strains. *Appl Env Microbiol*  
497 71:3581–3588.
- 498 17. Kearney B, Staskawicz BJ. 1990. Characterization of IS476 and its role in bacterial spot  
499 disease of tomato and pepper. *J Bacteriol* 172:143–148.
- 500 18. Jibrin MO, Potnis N, Timilsina S, Minsavage GV, Vallad GE, Roberts PD, Jones JB,  
501 Goss EM. 2018. Genomic Inference of Recombination-Mediated Evolution in *Xanthomonas*  
502 *euvesicatoria* and *X. perforans*. *Appl Env Microbiol* 84:e00136-18.
- 503 19. Timilsina S, Pereira-Martin JA, Minsavage GV, Iruegas Bocado F, Abrahamian P,  
504 Potnis N, Kolaczowski B, Vallad GE, Goss EM, Jones J. 2019. Multiple recombination events  
505 drive the current genetic structure of *Xanthomonas perforans* in Florida. *Front Microbiol* 10.
- 506 20. Schwartz AR, Potnis N, Timilsina S, Wilson M, Patané J, Martins JJ, Minsavage GV,  
507 Dahlbeck D, Akhunova A, Almeida N, Vallad GE, Barak JD, White FF, Miller SA, Ritchie D,  
508 Goss E, Bart RS, Setubal JC, Jones JB, Staskawicz BJ. 2015. Phylogenomics of *Xanthomonas*  
509 field strains infecting pepper and tomato reveals diversity in effector repertoires and identifies  
510 determinants of host specificity. *Front Microbiol* 6.
- 511 21. Barak JD, Vancheva T, Lefeuvre P, Jones JB, Timilsina S, Minsavage GV, Vallad GE,  
512 Koebnik R. 2016. Whole-Genome Sequences of *Xanthomonas euvesicatoria* Strains Clarify  
513 Taxonomy and Reveal a Stepwise Erosion of Type 3 Effectors. *Front Plant Sci* 7.
- 514 22. Constantin EC, Cleenwerck I, Maes M, Baeyen S, Malderghem CV, Vos PD, Cottyn B.  
515 2016. Genetic characterization of strains named as *Xanthomonas axonopodis* pv. *dieffenbachiae*  
516 leads to a taxonomic revision of the *X. axonopodis* species complex. *Plant Pathol* 65:792–806.
- 517 23. Parkinson N, Cowie C, Heeney J, Stead D. 2009. Phylogenetic structure of *Xanthomonas*  
518 determined by comparison of *gyrB* sequences. *Int J Syst Evol Microbiol* 59:264–274.
- 519 24. Cheng L, Connor TR, Sirén J, Aanensen DM, Corander J. 2013. Hierarchical and  
520 Spatially Explicit Clustering of DNA Sequences with BAPS Software. *Mol Biol Evol* 30:1224–  
521 1228.
- 522 25. Horvath DM, Stall RE, Jones JB, Pauly MH, Vallad GE, Dahlbeck D, Staskawicz BJ,  
523 Scott JW. 2012. Transgenic Resistance Confers Effective Field Level Control of Bacterial Spot  
524 Disease in Tomato. *PLoS ONE* 7:e42036.
- 525 26. Schornack S, Minsavage GV, Stall RE, Jones JB, Lahaye T. 2008. Characterization of  
526 AvrHah1, a novel AvrBs3-like effector from *Xanthomonas gardneri* with virulence and  
527 avirulence activity. *New Phytol* 179:546–556.
- 528 27. Schwartz AR, Morbitzer R, Lahaye T, Staskawicz BJ. 2017. TALE-induced bHLH  
529 transcription factors that activate a pectate lyase contribute to water soaking in bacterial spot of  
530 tomato. *Proc Natl Acad Sci* 201620407.

- 531 28. Schornack S, Ballvora A, Gürlebeck D, Peart J, Ganai M, Baker B, Bonas U, Lahaye T.  
532 2004. The tomato resistance protein Bs4 is a predicted non-nuclear TIR-NB-LRR protein that  
533 mediates defense responses to severely truncated derivatives of AvrBs4 and overexpressed  
534 AvrBs3. *Plant J* 37:46–60.
- 535 29. Bansal K, Kumar S, Patil PB. 2018. Complete Genome Sequence Reveals Evolutionary  
536 Dynamics of an Emerging and Variant Pathovar of *Xanthomonas euvesicatoria*. *Genome Biol*  
537 *Evol* 10:3104–3109.
- 538 30. Huang C-H, Vallad GE, Adkison H, Summers C, Margenthaler E, Schneider C, Hong J,  
539 Jones JB, Ong K, Norman DJ. 2013. A Novel *Xanthomonas* sp. Causes Bacterial Spot of Rose  
540 (*Rosa* spp.). *Plant Dis* 97:1301–1307.
- 541 31. Osdaghi E, Taghavi SM, Hamzehzarghani H, Lamichhane JR. 2016. Occurrence and  
542 Characterization of the Bacterial Spot Pathogen *Xanthomonas euvesicatoria* on Pepper in Iran. *J*  
543 *Phytopathol* 164:722–734.
- 544 32. Yaripour Z, Mohsen Taghavi S, Osdaghi E, Lamichhane JR. 2018. Host range and  
545 phylogenetic analysis of *Xanthomonas alfalfae* causing bacterial leaf spot of alfalfa in Iran. *Eur J*  
546 *Plant Pathol* 150:267–274.
- 547 33. Schauer K, Rodionov DA, de Reuse H. 2008. New substrates for TonB-dependent  
548 transport: do we only see the “tip of the iceberg”? *Trends Biochem Sci* 33:330–338.
- 549 34. Wiggerich H-G, Pühler A. 2000. The *exbD2* gene as well as the iron-uptake genes *tonB*,  
550 *exbB* and *exbD1* of *Xanthomonas campestris* pv. *campestris* are essential for the induction of a  
551 hypersensitive response on pepper (*Capsicum annuum*). *Microbiology* 146:1053–1060.
- 552 35. Vorhölter F-J, Wiggerich H-G, Scheidle H, Mrozek K, Pühler A, Niehaus K. 2012.  
553 Involvement of bacterial TonB-dependent signaling in the generation of an oligogalacturonide  
554 damage-associated molecular pattern from plant cell walls exposed to *Xanthomonas campestris*  
555 pv. *campestris* pectate lyases. *BMC Microbiol* 12:239.
- 556 36. Baptista JC, Machado MA, Homem RA, Torres PS, Vojnov AA, do Amaral AM. 2010.  
557 Mutation in the *xpsD* gene of *Xanthomonas axonopodis* pv. *citri* affects cellulose degradation  
558 and virulence. *Genet Mol Biol* 33:146–153.
- 559 37. Solé M, Scheibner F, Hoffmeister A-K, Hartmann N, Hause G, Rother A, Jordan M,  
560 Lautier M, Arlat M, Büttner D. 2015. *Xanthomonas campestris* pv. *vesicatoria* Secretes  
561 Proteases and Xylanases via the Xps Type II Secretion System and Outer Membrane Vesicles. *J*  
562 *Bacteriol* 197:2879–2893.
- 563 38. Szczesny R, Jordan M, Schramm C, Schulz S, Copez V, Bonas U, Büttner D. 2010.  
564 Functional characterization of the Xcs and Xps type II secretion systems from the plant  
565 pathogenic bacterium *Xanthomonas campestris* pv. *vesicatoria*. *New Phytol* 187:983–1002.
- 566 39. Ausubel FM, Brent R, Kingston RE, Moore DD, Seidman JG, Smith JA, Struhl K. 1994.  
567 *Current protocols in molecular biology*. John Wiley and Sons, New York. 2.0.1–2.14.8

- 568 40. Coil D, Jospin G, Darling AE. 2015. A5-miseq: an updated pipeline to assemble  
569 microbial genomes from Illumina MiSeq data. *Bioinformatics* 31:587–589.
- 570 41. Bolger AM, Lohse M, Usadel B. 2014. Trimmomatic: a flexible trimmer for Illumina  
571 sequence data. *Bioinformatics* 30:2114–2120.
- 572 42. Simpson JT, Durbin R. 2012. Efficient de novo assembly of large genomes using  
573 compressed data structures. *Genome Res* 22:549–556.
- 574 43. Peng Y, Leung HCM, Yiu SM, Chin FYL. 2010. IDBA – A Practical Iterative de Bruijn  
575 Graph De Novo Assembler, p. 426–440. *In* Berger, B (ed.), *Research in Computational*  
576 *Molecular Biology*. Springer Berlin Heidelberg.
- 577 44. Seemann T. 2015. snippy: fast bacterial variant calling from NGS reads.  
578 <https://github.com/tseemann/snippy>.
- 579 45. Cox MP, Peterson DA, Biggs PJ. 2010. SolexaQA: At-a-glance quality assessment of  
580 Illumina second-generation sequencing data. *BMC Bioinformatics* 11:485.
- 581 46. Li H, Durbin R. 2009. Fast and accurate short read alignment with Burrows–Wheeler  
582 transform. *Bioinformatics* 25:1754–1760.
- 583 47. Li H, Handsaker B, Wysoker A, Fennell T, Ruan J, Homer N, Marth G, Abecasis G,  
584 Durbin R. 2009. The Sequence Alignment/Map format and SAMtools. *Bioinformatics* 25:2078–  
585 2079.
- 586 48. Garrison E, Marth G. 2012. Haplotype-based variant detection from short-read  
587 sequencing. Preprint at <https://arxiv.org/abs/1207.3907>
- 588 49. Nguyen L-T, Schmidt HA, von Haeseler A, Minh BQ. 2015. IQ-TREE: A Fast and  
589 Effective Stochastic Algorithm for Estimating Maximum-Likelihood Phylogenies. *Mol Biol Evol*  
590 32:268–274.
- 591 50. Kalyaanamoorthy S, Minh BQ, Wong TKF, von Haeseler A, Jermin LS. 2017.  
592 ModelFinder: fast model selection for accurate phylogenetic estimates. *Nat Methods* 14:587–  
593 589.
- 594 51. Minh BQ, Nguyen MAT, von Haeseler A. 2013. Ultrafast Approximation for  
595 Phylogenetic Bootstrap. *Mol Biol Evol* 30:1188–1195.
- 596 52. Treangen TJ, Ondov BD, Koren S, Phillippy AM. 2014. The Harvest suite for rapid core-  
597 genome alignment and visualization of thousands of intraspecific microbial genomes. *Genome*  
598 *Biol* 15:524.
- 599 53. Hadfield J, Croucher NJ, Goater RJ, Abudahab K, Aanensen DM, Harris SR. 2018.  
600 Phandango: an interactive viewer for bacterial population genomics. *Bioinformatics* 34:292–293.
- 601 54. Harrison KJ, Crécy-Lagard V de, Zallot R. 2018. Gene Graphics: a genomic  
602 neighborhood data visualization web application. *Bioinformatics* 34:1406–1408.



- 603 55. Stamatakis A. 2014. RAxML version 8: a tool for phylogenetic analysis and post-analysis  
604 of large phylogenies. *Bioinformatics* 30:1312–1313.
- 605 56. Antipov D, Hartwick N, Shen M, Raiko M, Lapidus A, Pevzner PA. 2016.  
606 plasmidSPAdes: assembling plasmids from whole genome sequencing data. *Bioinformatics*  
607 btw493.
- 608 57. Grau J, Reschke M, Erkes A, Streubel J, Morgan RD, Wilson GG, Koebnik R, Boch J.  
609 2016. AnnoTALE: bioinformatics tools for identification, annotation, and nomenclature of  
610 TALEs from *Xanthomonas* genomic sequences. *Sci Rep* 6:21077.
- 611

**Table 1.** Collection information, assembly statistics, and pathogenicity phenotyping on differential pepper varieties for the *X. perforans* strains sequenced in this study.

| Strain | Host   | County     | Contigs (N) | N50 (kb) | Genome size (Mb) | GenBank Accession No. |
|--------|--------|------------|-------------|----------|------------------|-----------------------|
| AL1    | Tomato | Lee        | 86          | 1.78     | 5.02             | SMVJ00000000          |
| AL65   | Pepper | Lee        | 58          | 1.91     | 5.02             | SMVI00000000          |
| AL66   | Pepper | Lee        | 52          | 2.49     | 5.02             | SMVH00000000          |
| AL57   | Tomato | Lee        | 55          | 2.68     | 4.97             | SMVC00000000          |
| AL33   | Tomato | Tuscaloosa | 60          | 2.27     | 5.22             | SMVE00000000          |
| AL37   | Tomato | Tuscaloosa | 98          | 1.31     | 5.28             | SMVD00000000          |
| ALS7B  | Pepper | Tuscaloosa | 65          | 1.87     | 5.06             | SMVG00000000          |
| ALS7E  | Pepper | Tuscaloosa | 88          | 1.39     | 5.15             | SMVF00000000          |

**Table 2.** Pathogenicity phenotyping and distribution of type 3 secreted effectors among *X. perforans* strains isolated from tomato and pepper in Alabama.

|                                      | ALS7E                | AL33 | AL37 | AL57 | ALS7B | AL1 | AL65 | AL66 |
|--------------------------------------|----------------------|------|------|------|-------|-----|------|------|
| ECW <sup>a</sup>                     | C                    | HR   | HR   | HR   | C     | C   | C    | C    |
| ECW30R <sup>a</sup>                  | C                    | HR   | HR   | HR   | C     | HR  | HR   | HR   |
| <i>avrXv3</i>                        | IS <sup>d</sup>      | +    | +    | +    | IS    | IS  | IS   | IS   |
| <i>xopAQ</i> <sup>*</sup>            | -                    | -    | +    | +    | -     | -   | -    | -    |
| <i>pthXp1</i>                        | - <sup>c</sup>       | -    | +    | +    | -     | -   | -    | -    |
| <i>avrBsT</i> homologue <sup>*</sup> | -                    | -    | +    | +    | -     | -   | -    | -    |
| <i>xopE3</i> <sup>*</sup>            | -                    | -    | IS   | IS   | -     | -   | -    | -    |
| <i>xopE2</i> <sup>*</sup>            | +                    | +    | +    | -    | -     | -   | -    | -    |
| <i>avrHah1</i> <sup>*</sup>          | -                    | -    | -    | -    | -     | +   | +    | +    |
| <i>xopAO</i> <sup>*</sup>            | -                    | -    | -    | -    | -     | +   | +    | +    |
| <i>avrXv4</i>                        | +                    | +    | +    | +    | +     | +   | +    | +    |
| <i>xopA</i>                          | +                    | +    | +    | +    | +     | +   | +    | +    |
| <i>xopAD</i>                         | +                    | +    | +    | +    | +     | +   | +    | +    |
| <i>xopAE</i>                         | +                    | +    | +    | +    | +     | +   | +    | +    |
| <i>xopAK</i>                         | +                    | +    | +    | +    | +     | +   | +    | +    |
| <i>avrBs2</i>                        | + <sup>b</sup>       | +    | +    | +    | +     | +   | +    | +    |
| <i>xopAP</i>                         | +                    | +    | +    | +    | +     | +   | +    | +    |
| <i>xopAR</i>                         | +                    | +    | +    | +    | +     | +   | +    | +    |
| <i>xopC2</i>                         | +                    | +    | +    | +    | +     | +   | +    | +    |
| <i>xopD</i>                          | + (Ctg) <sup>e</sup> | +    | +    | +    | +     | +   | +    | +    |
| <i>xopE1</i>                         | +                    | +    | +    | +    | +     | +   | +    | +    |
| <i>xopF1</i>                         | +                    | +    | +    | +    | +     | +   | +    | +    |
| <i>xopF2</i>                         | +                    | +    | +    | +    | +     | +   | +    | +    |
| <i>xopI</i>                          | +                    | +    | +    | +    | +     | +   | +    | +    |
| <i>xopK</i>                          | +                    | +    | +    | +    | +     | +   | +    | +    |
| <i>xopL</i>                          | +                    | +    | +    | +    | +     | +   | +    | +    |

|              |   |   |   |   |   |   |   |   |
|--------------|---|---|---|---|---|---|---|---|
| <i>xopN</i>  | + | + | + | + | + | + | + | + |
| <i>xopP1</i> | + | + | + | + | + | + | + | + |
| <i>xopP2</i> | + | + | + | + | + | + | + | + |
| <i>xopQ</i>  | + | + | + | + | + | + | + | + |
| <i>xopR</i>  | + | + | + | + | + | + | + | + |
| <i>xopV</i>  | + | + | + | + | + | + | + | + |
| <i>xopX</i>  | + | + | + | + | + | + | + | + |
| <i>xopZ</i>  | + | + | + | + | + | + | + | + |

<sup>a</sup>Pathogenicity phenotyping on pepper cv. Early Cal Wonder (ECW) and ECW30R. A compatible reaction is indicated with (C) and hypersensitive resistance with (HR).

<sup>b</sup>The gene was present with an intact coding sequence

<sup>c</sup>The gene was absent

<sup>d</sup>The gene was disrupted by an insertion sequence

<sup>e</sup>The gene was present at the end of a contig break

\*The T3SE was present in contigs assembled by plasmidSPAdes in at least one strain

**Figure 1.** Mid-point rooted, maximum-likelihood phylogeny of 41 *X. perforans* strains isolated from tomato and pepper plants grown in Florida and Alabama based on a concatenated alignment of 16,806 core-genome single nucleotide polymorphisms (SNPs). The tips are color-coded according to the sequence clusters (SCs) identified in first level of HierBAPS hierarchy (24). The phylogroup designations of strains described previously (19, 20) are shown in parentheses and strains sequenced in this study are highlighted in red. The scale bar indicates the number of substitutions per site.

**Figure 2.** Identification of a new class of transcription activation-like effector, *pthXp1*, in *X. perforans*. (A) Dendrogram (left) constructed from an alignment of repeat variable di-residues (right) found among the *avrBs3* family of effectors previously described in bacterial spot causing xanthomonads and *pthXp1* from *X. perforans* strains AL37 and AL57 (shown in red). The scale bars indicate the number of substitutions per site. (B) Differential reactions of *X. perforans* strains with and without *pthXp1* and *X. euvesicatoria* strain 87-7 with *avrBs4* in tomato cv. MoneyMaker with *Bs4* resistance. Tomato leaves were infiltrated with a bacterial suspension raised to  $10^8$  CFU ml<sup>-1</sup>. A hypersensitive resistance is indicated by the appearance of collapsed/necrotic leaf tissue, 24h after inoculation. (C) Bacterial growth of *X. perforans* strains with (AL37 and AL57) and without (Xp17-12 and AL33) *pthXp1*, in tomato cv. BonnyBest. Plants were infiltrated with a bacterial suspension raised to  $10^4$  CFU ml<sup>-1</sup>. Four replications were included for each treatment and the experiment was carried out twice with similar results. No significant differences in growth were observed four days after inoculation ( $P < 0.05$ ).

**Figure 3.** Landscape of homologous recombination across the *X. euvesicatoria* species complex.

(A) Phylogeny of 67 *X. perforans*, *X. euvesicatoria*, and strains of related *Xanthomonas* spp.

based on a core genome alignment of 3.98 Mb. The sequence clusters inferred within *X.*

*perforans* (see Figure 1) are labeled at the nodes and the strains sequenced in this study are

highlighted in red. Lineages predicted by FastGear software are color coded to the right of tree.

(B) Patterns of recent recombination across the core genome of *X. perforans*, *X. euvesicatoria*,

and related *Xanthomonas* spp. Colors indicate donor lineage of the recent recombination events

and the line graph above shows the frequency of recombination within *X. perforans* at a

particular site in the alignment. Recombination events originating from outside of the sampled

*Xanthomonas* population are shown in red. (C) Gene content of core genome loci with elevated

recombination frequency (numbered i to vii) within *X. perforans*. Gene are color coded-coded

according to their annotation, with hypothetical proteins shown in purple. Gene names/functional

annotations are shown where available. The abbreviation, TBDR, indicates a putative TonB-

dependent receptor.

**Figure 4.** Summary of the proportion and origin of recent recombination among lineages within

*X. euvesicatoria* species complex, as predicted by FastGear. The phylogroup designation of the

*X. perforans* sequence clusters (SCs) as described in previous studies are shown in parentheses

(19, 20). Outside of *X. euvesicatoria* group shows the proportion of recombinant sequences

donated from outside of the sampled *Xanthomonas* population. The error bar indicates that

standard deviation of the mean.

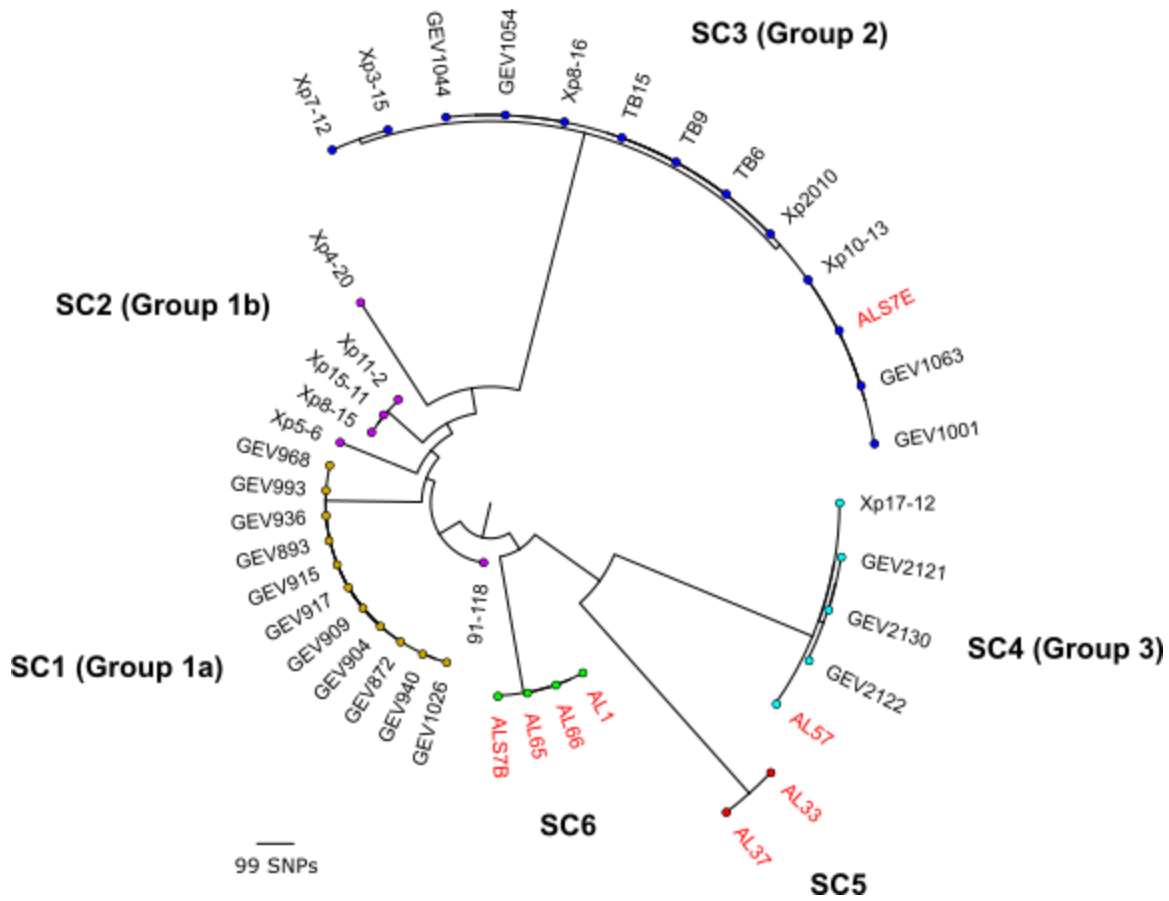

**Figure 1.** Mid-point rooted, maximum-likelihood phylogeny of 41 *X. perforans* strains isolated tomato and pepper plants grown in Florida and Alabama based on a concatenated alignment of 16,806 core-genome single nucleotide polymorphisms (SNPs). The tips are color-coded according to the sequence clusters (SCs) identified in first level of HierBAPS hierarchy (24). The phylogroup designations of strains described previously (19, 20) are shown in parentheses and strains sequenced in this study are highlighted in red. The scale bar indicates the number of substitutions per site.

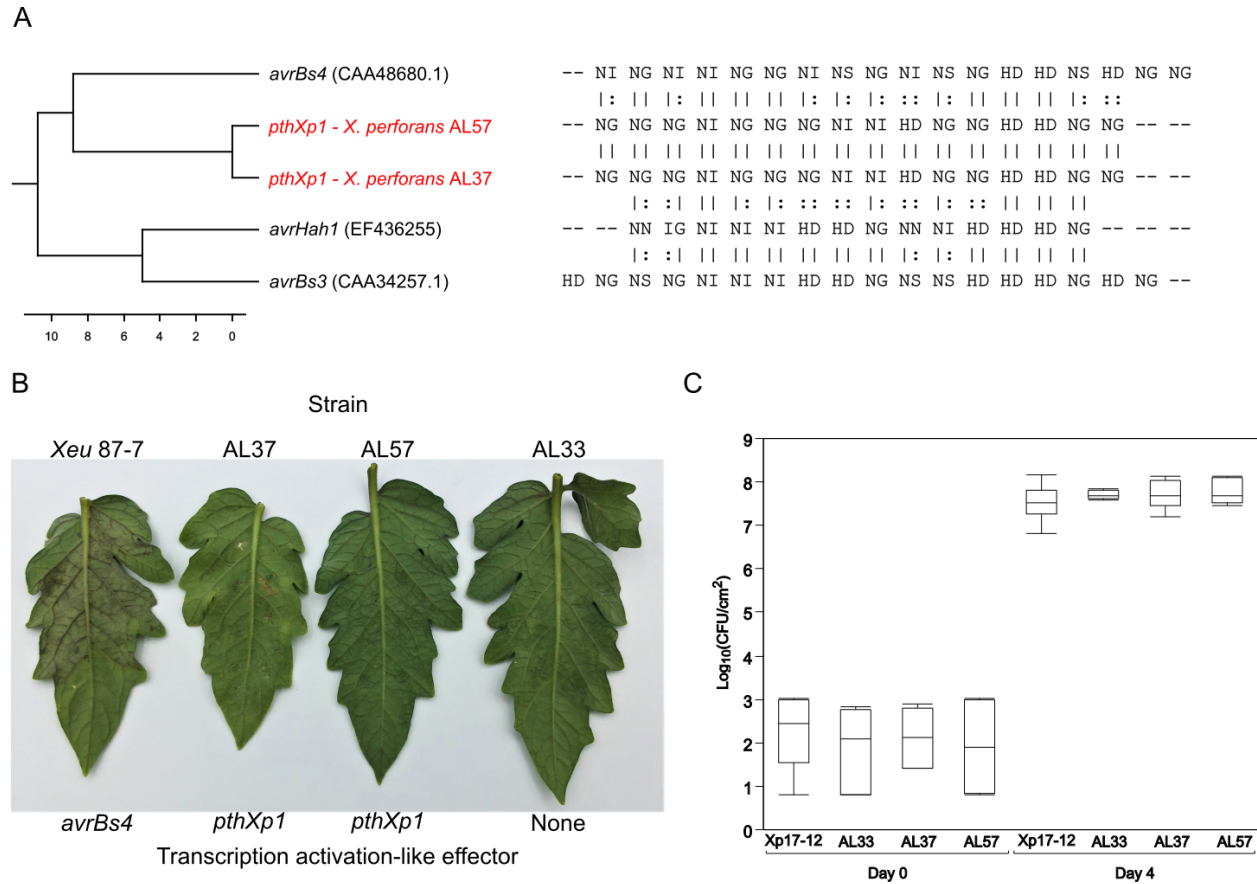

**Figure 2.** Identification of a new class of transcription activation-like effector, *pthXp1*, in *X. perforans*. (A) Dendrogram (left) constructed from an alignment of repeat variable di-residues (right) found among the *avrBs3* family of effectors previously described in bacterial spot causing xanthomonads and *pthXp1* from *X. perforans* strains AL37 and AL57 (shown in red). The scale bars indicate the number of substitutions per site. (B) Differential reactions of *X. perforans* strains with and without *pthXp1* and *X. euvesicatoria* strain 87-7 with *avrBs4* in tomato cv. MoneyMaker which has *Bs4* resistance. Tomato leaves were infiltrated with a bacterial suspension raised to  $10^8$  CFU ml<sup>-1</sup>. A hypersensitive resistance is indicated by the appearance of collapsed/necrotic leaf tissue, 24h after inoculation. (C) Bacterial growth of *X. perforans* strains with (AL37 and AL57) and without (Xp17-12 and AL33) *pthXp1*, in tomato cv. BonnyBest. Plants were infiltrated with a bacterial suspension raised to  $10^4$  CFU ml<sup>-1</sup>. Four replications were included for each treatment and the experiment was carried out twice with similar results. No significant differences in growth were observed four days after inoculation ( $P < 0.05$ ).

**A**

- *X. perforans*
- *X. euvesicatoria*
- *Xanthomonas* sp.
- Outside of *X. euvesicatoria* complex

**B**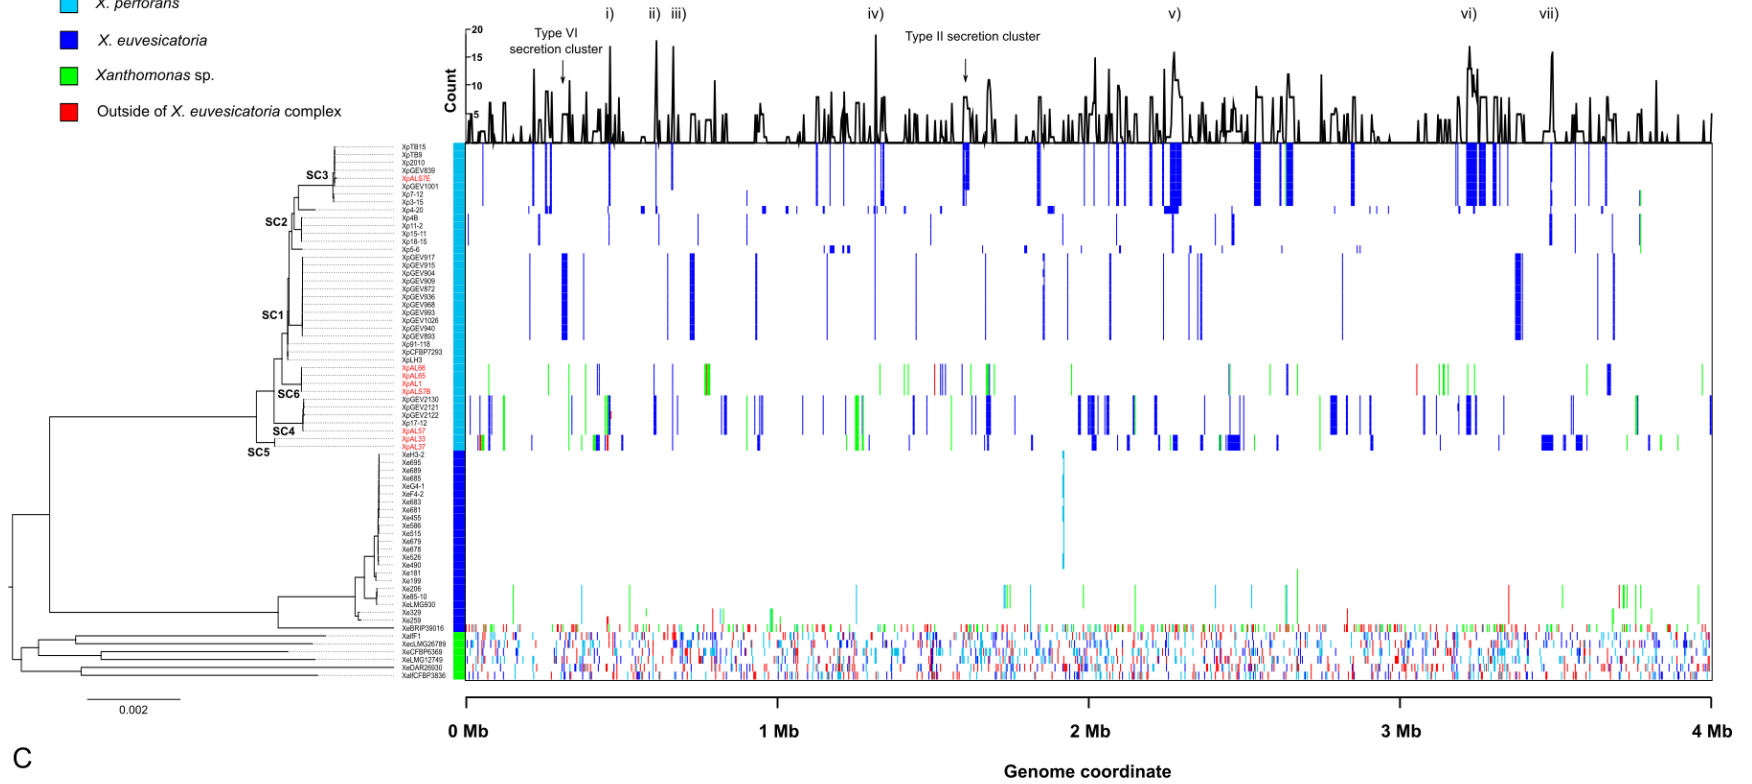**C**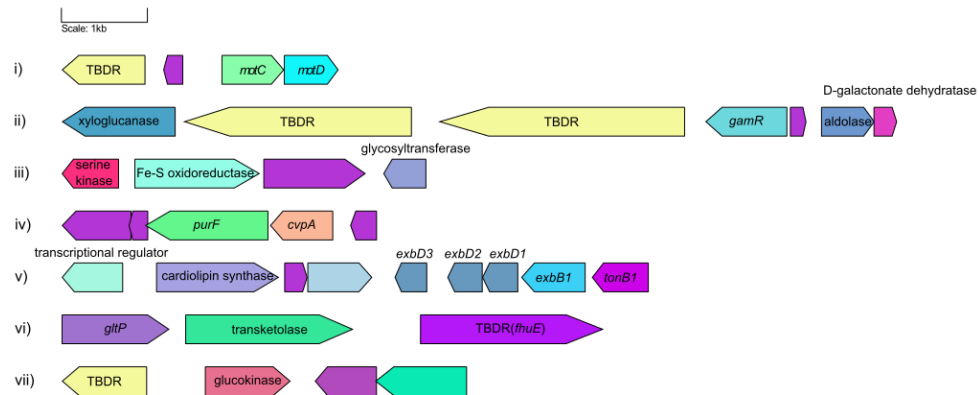



**Figure 3.** Landscape of homologous recombination across the *X. euvesicatoria* species complex. (A) Phylogeny of 67 *X. perforans*, *X. euvesicatoria*, and strains of related *Xanthomonas* species based on a core genome alignment of 3.98 Mb. The sequence clusters inferred within *X. perforans* (see Figure 1) are labeled at the nodes and the strains sequenced in this study are highlighted in red. Lineages predicted by FastGear software are color coded to the right of tree. (B) Patterns of recent recombination across the core genome of *X. perforans*, *X. euvesicatoria*, and related *Xanthomonas* species. Colors indicate donor lineage of the recent recombination events and the line graph above shows the frequency of recombination within *X. perforans* at a particular site in the alignment. Recombination events originating from outside of the sampled *Xanthomonas* population are shown in red. (C) Gene content of core genome loci with elevated recombination frequency (numbered i to vii) within *X. perforans*. Genes are color coded according to their annotation, with hypothetical proteins shown in purple. Gene names/functional annotations are shown where available. The abbreviation, TBDR, indicates a putative TonB-dependent receptor.

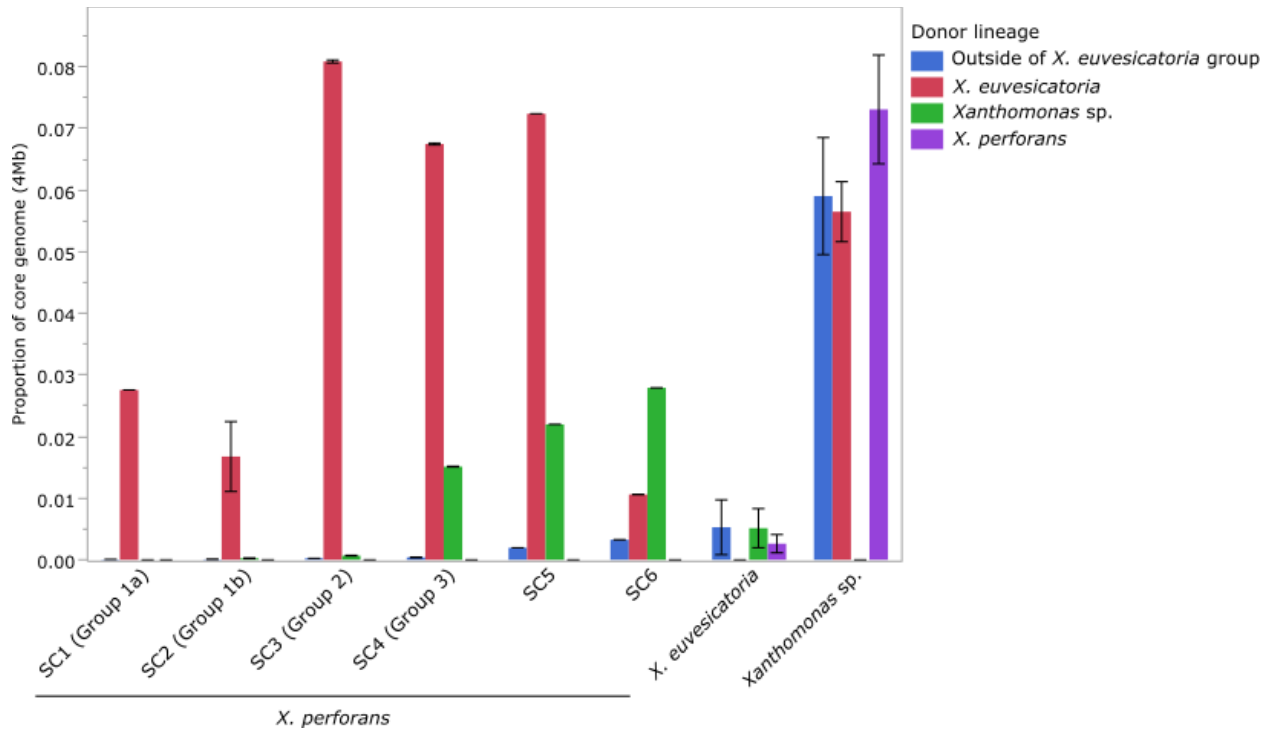

**Figure 4.** Summary of the proportion and origin of recent recombination among lineages within *X. euvesicatoria* species complex, as predicted by FastGear. The phylogroup designation of the *X. perforans* sequence clusters (SCs) as described in previous studies are shown in parentheses (19, 20). Outside of *X. euvesicatoria* group shows the proportion of recombinant sequences donated from outside of the sampled *Xanthomonas* population. The error bar indicates that standard deviation of the mean.
